# Supplementary material for: Broadband microwave absorber constructed by reduced graphene oxide/La0.7Sr0.3MnO3 composites
Source: Royal Society of Chemistry journal article supplement (doi:10.1039/c9ra09474a), 2019-01-01
Supplement: c9ra09474a1.pdf [file c9ra09474a1.pdf]

## Supporting information:

### **Broadband Microwave Absorber Constructed by Reduced Graphene Oxide/La<sub>0.7</sub>Sr<sub>0.3</sub>MnO<sub>3</sub> Composites**

*Kelan Yan<sup>a</sup>, Feng Yin<sup>a</sup>, Chao Pang<sup>a</sup>, Xiuhui Zuo<sup>a</sup>, Qitu Zhang<sup>b</sup>, Liming Shen<sup>a</sup>, Runhua Fan<sup>c</sup>, and  
Ningzhong Bao<sup>a</sup>*

*<sup>a</sup>State Key Laboratory of Material-Oriented Chemical Engineering, College of Chemical Engineering,  
Nanjing Tech University, Nanjing, Jiangsu 210009, P. R. China*

*<sup>b</sup>College of Materials Science and Engineering, Nanjing Tech University, Nanjing, Jiangsu 210009,  
P. R. China*

*<sup>c</sup>College of Ocean Science and Engineering, Shanghai Maritime University, Shanghai 201306, China*

*<sup>†</sup> Corresponding author: Tel. & Fax: +86 25 83172244; E-mail: nzhbao@njtech.edu.cn (N. Bao)*

Figure S1 show the SEM image of pure LSMO powder and optical image of rGO/LSMO composite form. The LSMO particle size is  $\sim 100$  nm, as shown in Figure S1a; rGO/LSMO composite form indicates the LSMO powder homogeneously distribute in flaky structure of rGO.

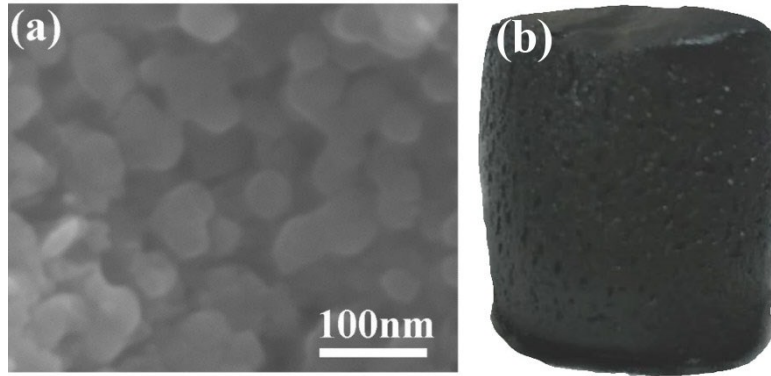

**Figure S1**(a) SEM image of pure LSMO powder and (b) optical image of rGO/LSMO composite form.

Figure S2 show the permittivity ( $\epsilon = \epsilon' + i\epsilon''$ ) and permeability ( $\mu = \mu' + i\mu''$ ) of pure LSMO. As shown in figure S2 (a), the real part  $\epsilon'$  value of is range from 25 to 32; and the imaginary part  $\epsilon''$  value of is range from 2 to 8. From figure S2 (b), the real part  $\mu'$  value is around 0.1~0.2, and the imaginary part  $\mu''$  is -0.1~ 0.3.

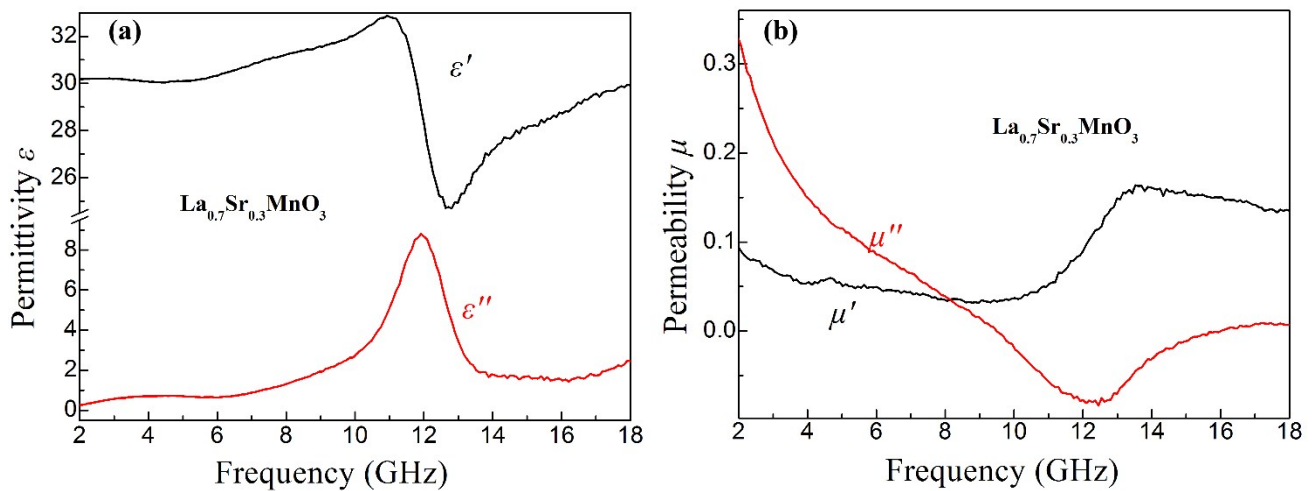

Figure S2 (a) The permittivity and (b) permeability of pure LSMO.

Figure S3 show the permittivity ( $\epsilon = \epsilon' + i\epsilon''$ ) and permeability ( $\mu = \mu' + i\mu''$ ) of pure rGO. As shown in figure S3, the real part  $\epsilon'$  value of is range from 40 to 80; and the imaginary part  $\epsilon''$  value of is range from 12.5 to 30; the real part  $\mu'$  value is around 0.2~0.8, and the imaginary part  $\mu''$  is 0.2~ 1.0.

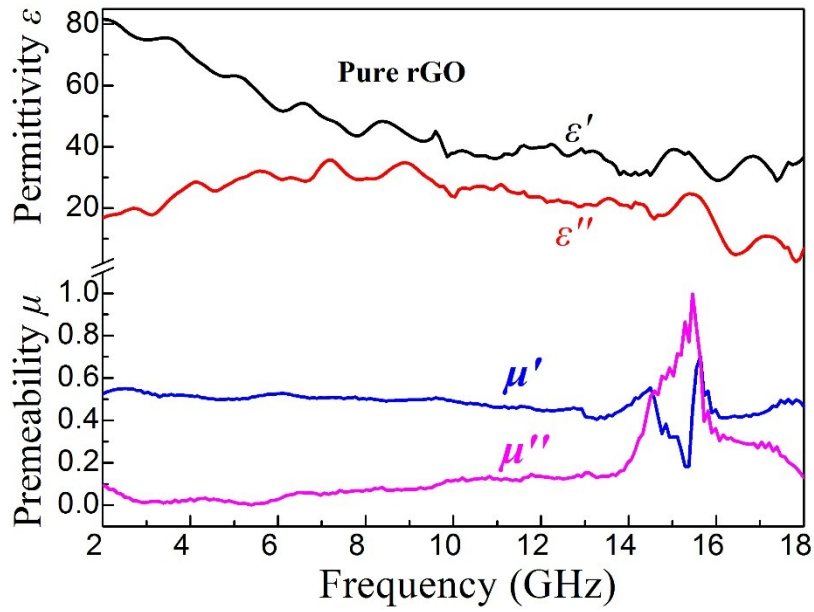

Figure S3 The permittivity and permeability of pure rGO.

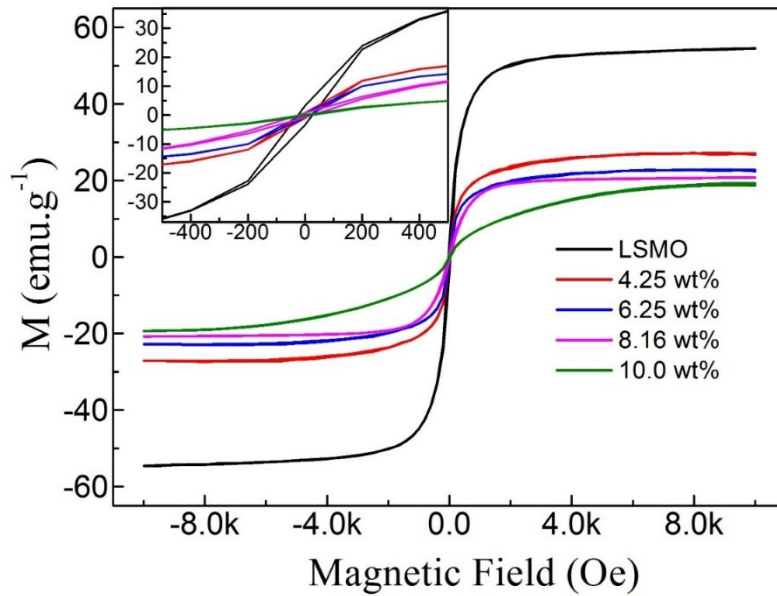

Figure S4 VSM of LSMO and rGO/LSMO with different weigh percent of rGO.

Figure S4 shows hysteresis loop of the rGO/LSMO composites. The results of VSM analysis show that the saturation magnetization and coercivity are decreased by increasing the percentage of the rGO. LSMO show the ferromagnetic with saturation magnetization ( $M_s$ ) of  $54.5 \text{ emu}\cdot\text{g}^{-1}$ . The coercivity ( $H_c$ ) and remanence ( $M_r$ ) of LSMO are  $25.63 \text{ Oe}$  and  $0.02 \text{ emu}\cdot\text{g}^{-1}$ , respectively. It can be observed that the  $M_s$  and  $M_r$  are dropped dramatically with an increase in the nonmagnetic rGO; the coercivity

of rGO/LSMO composites declined slightly compared with pure LSMO and gradually showed the magnetic characteristic of paramagnetic.
